# Supplementary material
Source: publisher site journal article supplement (https://www.dovepress.com/article/572888)
Supplement: Supplementary file 1 [file 572888%20Revised%20Supplementary%20Material.docx]

**Table S1. *P* value of spearman's correlation**

|  | **ESR** | **CRP** | **NEUT** | **MONO** | **LYMPH** | **NLR** | **WBC** | **Hb** | **WBCHR** |
| --- | --- | --- | --- | --- | --- | --- | --- | --- | --- |
| **Duration** | 9.90E-02 | 7.37E-01 | 1.89E-02 | 4.52E-01 | 1.54E-29 | 3.44E-09 | 4.79E-08 | 1.03E-109 | 6.87E-05 |
| **SBP** | 7.08E-02 | 6.96E-02 | 2.83E-09 | 4.65E-04 | 2.91E-04 | 6.77E-12 | 1.13E-04 | 8.65E-12 | 3.23E-12 |
| **DBP** | 5.99E-01 | 4.44E-03 | 8.07E-05 | 1.67E-02 | 1.87E-06 | 9.73E-01 | 4.09E-06 | 2.32E-43 | 1.67E-01 |
| **HbA1c** | 7.85E-03 | 7.27E-12 | 4.14E-29 | 8.39E-12 | 2.34E-04 | 2.89E-07 | 6.63E-35 | 1.19E-19 | 2.10E-12 |
| **LDL-c** | 2.69E-04 | 6.23E-07 | 3.38E-02 | 4.73E-02 | 2.61E-45 | 2.33E-27 | 7.65E-02 | 2.34E-43 | 7.16E-04 |
| **HDL-c** | 3.08E-07 | 4.83E-28 | 2.43E-25 | 2.59E-30 | 2.35E-01 | 4.51E-16 | 3.81E-25 | 1.54E-05 | 6.82E-13 |
| **TG** | 5.43E-01 | 2.75E-02 | 8.92E-06 | 5.75E-03 | 2.03E-59 | 1.50E-12 | 6.26E-19 | 5.10E-46 | 2.59E-03 |
| **TC** | 8.12E-05 | 2.77E-08 | 9.15E-01 | 1.28E-03 | 7.10E-49 | 4.19E-22 | 3.28E-04 | 2.51E-49 | 1.09E-01 |
| **GA** | 3.67E-03 | 9.31E-12 | 3.28E-08 | 3.35E-02 | 6.37E-04 | 3.68E-08 | 1.21E-06 | 5.99E-04 | 2.83E-02 |
| **UA** | 2.74E-01 | 7.65E-01 | 3.22E-14 | 9.93E-12 | 5.83E-10 | 1.51E-01 | 5.59E-21 | 2.98E-20 | 2.06E-10 |
| **FBG** | 4.63E-02 | 5.77E-13 | 4.36E-61 | 1.42E-03 | 2.80E-13 | 3.94E-61 | 5.51E-36 | 8.96E-26 | 1.09E-12 |
| **CysC** | 2.06E-16 | 3.11E-08 | 1.38E-15 | 1.02E-21 | 2.22E-28 | 1.48E-39 | 8.83E-07 | 1.24E-106 | 3.78E-46 |
| **Creatinine** | 4.97E-03 | 1.25E-04 | 2.32E-25 | 1.06E-25 | 1.03E-14 | 5.49E-36 | 3.45E-16 | 4.68E-01 | 4.05E-20 |
| **BUN** | 3.67E-04 | 7.03E-03 | 5.76E-20 | 6.38E-08 | 3.48E-23 | 4.41E-38 | 3.72E-09 | 5.26E-19 | 2.73E-23 |
| **UACR** | 1.78E-26 | 4.29E-13 | 3.69E-51 | 9.26E-11 | 3.42E-22 | 2.34E-64 | 1.82E-29 | 2.07E-74 | 7.02E-81 |
| **Urine Creatinine** | 2.51E-13 | 2.04E-05 | 1.28E-08 | 4.43E-01 | 3.68E-30 | 7.78E-31 | 5.78E-02 | 4.43E-142 | 1.74E-34 |
| **24h microalbumin** | 5.83E-18 | 8.60E-07 | 1.15E-51 | 1.10E-17 | 1.45E-09 | 7.24E-49 | 2.96E-36 | 2.64E-33 | 1.05E-70 |
| **24hU-TP** | 1.13E-34 | 8.94E-26 | 4.84E-77 | 2.56E-43 | 2.55E-24 | 2.13E-88 | 1.26E-49 | 3.15E-43 | 8.76E-96 |
| **Microalbumin** | 7.77E-02 | 5.81E-02 | 8.15E-11 | 6.36E-02 | 2.14E-01 | 1.81E-07 | 1.18E-09 | 7.10E-07 | 2.25E-16 |
| **eGFR** | 7.60E-08 | 2.92E-02 | 7.80E-03 | 3.00E-01 | 1.07E-45 | 1.21E-30 | 4.87E-02 | 2.06E-138 | 1.75E-18 |

**Abbreviation:** BUN: blood urea nitrogen; CRP: C-reactive protein; Cys-C: cystatin C; DBP: diastolic blood pressure; eGFR: estimated glomerular filtration rate; ESR: erythrocyte sedimentation rate; FBG: fasting blood glucose; GA: glycated albumin; Hb: hemoglobin; HbA1c: glycated hemoglobin; HDL-c: high-density lipoprotein cholesterol; LDL-c: low-density lipoprotein cholesterol; LYMPH: lymphocyte; MONO: monocyte; NEUT: neutrophil; NLR: neutrophil-to-lymphocyte ratio; SBP: systolic blood pressure; TC: total cholesterol; TG: triglyceride; UA: uric acid; UACR: urinary albumin creatinine ratio; WBC: white cell count; WBCHR: white blood cell-to-hemoglobin ratio; 24hU-TP: 24-hour urine protein.

**Table S2. r value of spearman's correlation**

|  | **ESR** | **CRP** | **NEUT** | **MONO** | **LYMPH** | **NLR** | **WBC** | **Hb** | **WBCHR** |
| --- | --- | --- | --- | --- | --- | --- | --- | --- | --- |
| **Duration** | 0.068 | -0.009 | -0.031 | 0.010 | -0.147 | 0.077 | -0.071 | -0.286 | 0.052 |
| **SBP** | 0.077 | -0.052 | 0.080 | 0.047 | -0.049 | 0.093 | 0.052 | -0.092 | 0.094 |
| **DBP** | -0.022 | -0.082 | 0.053 | 0.032 | 0.064 | 0.000 | 0.062 | 0.185 | -0.019 |
| **HbA1c** | 0.115 | 0.202 | 0.157 | 0.096 | 0.052 | 0.072 | 0.173 | 0.128 | 0.099 |
| **LDL-c** | -0.156 | -0.142 | -0.029 | -0.027 | 0.191 | -0.147 | 0.024 | 0.187 | -0.046 |
| **HDL-c** | -0.218 | -0.307 | -0.141 | -0.155 | 0.016 | -0.111 | -0.141 | -0.059 | -0.098 |
| **TG** | -0.026 | -0.063 | 0.061 | 0.038 | 0.219 | -0.096 | 0.121 | 0.193 | 0.041 |
| **TC** | -0.163 | -0.154 | -0.001 | -0.043 | 0.194 | -0.129 | 0.048 | 0.195 | -0.021 |
| **GA** | 0.135 | 0.209 | 0.082 | 0.031 | -0.051 | 0.081 | 0.072 | 0.051 | 0.032 |
| **UA** | -0.046 | -0.008 | 0.101 | 0.091 | 0.083 | 0.019 | 0.125 | 0.123 | 0.085 |
| **FBS** | 0.084 | 0.199 | 0.218 | 0.043 | -0.097 | 0.218 | 0.166 | 0.140 | 0.095 |
| **CysC** | 0.335 | 0.154 | 0.107 | 0.128 | -0.147 | 0.175 | 0.066 | -0.288 | 0.189 |
| **Creatinine** | 0.118 | 0.107 | 0.139 | 0.140 | -0.103 | 0.167 | 0.109 | -0.010 | 0.123 |
| **BUN** | 0.149 | 0.075 | 0.122 | 0.072 | -0.132 | 0.172 | 0.079 | -0.119 | 0.133 |
| **UACR** | 0.478 | 0.210 | 0.219 | 0.095 | -0.142 | 0.246 | 0.165 | -0.264 | 0.275 |
| **Urine Creatinine** | -0.339 | -0.124 | -0.084 | 0.011 | 0.167 | -0.169 | -0.028 | 0.361 | -0.179 |
| **24h microalbumin** | 0.360 | 0.139 | 0.206 | 0.117 | -0.083 | 0.200 | 0.172 | -0.164 | 0.241 |
| **24hU-TP** | 0.494 | 0.292 | 0.251 | 0.188 | -0.139 | 0.268 | 0.201 | -0.187 | 0.279 |
| **Microalbumin** | 0.075 | 0.054 | 0.089 | 0.025 | -0.017 | 0.071 | 0.083 | -0.068 | 0.112 |
| **eGFR** | -0.270 | -0.068 | -0.042 | -0.016 | 0.221 | -0.180 | 0.031 | 0.380 | -0.138 |

**Abbreviation:** BUN: blood urea nitrogen; CRP: C-reactive protein; Cys-C: cystatin C; DBP: diastolic blood pressure; eGFR: estimated glomerular filtration rate; ESR: erythrocyte sedimentation rate; FBG: fasting blood glucose; GA: glycated albumin; Hb: hemoglobin; HbA1c: glycated hemoglobin; HDL-c: high-density lipoprotein cholesterol; LDL-c: low-density lipoprotein cholesterol; LYMPH: lymphocyte; MONO: monocyte; NEUT: neutrophil; NLR: neutrophil-to-lymphocyte ratio; SBP: systolic blood pressure; TC: total cholesterol; TG: triglyceride; UA: uric acid; UACR: urinary albumin creatinine ratio; WBC: white cell count; WBCHR: white blood cell-to-hemoglobin ratio; 24hU-TP: 24-hour urine protein.
